# Supplementary material
Source: PubMed Central journal article supplement (PMC7212500)
Supplement: NIHMS1560621-supplement-Supplemental_Table.pdf [file NIHMS1560621-supplement-Supplemental_Table.pdf]

## Supplemental Table 1

| Gene                          | FORWARD                  | REVERSE                  |
|-------------------------------|--------------------------|--------------------------|
| <i>Csf1r</i>                  | GACCTGCTCCACTTCTCCAG     | GGGTTGACACCAAGCGAGAAG    |
| <i>Csf-1</i>                  | AAGGGACTCACTAGCCTGGA     | ATCAGGCTCTTCTTGGGA       |
| <i>Il-34</i>                  | CTTTGGGAAACGAGAATTTGGAGA | GCAATCCTGTAGTTGATGGGGAAG |
| <i>Nos2</i>                   | TCACGCTTGGGTCTTGTT       | CAGGTCACITTTGGTAGGATTT   |
| <i>Il-6</i>                   | TCCATCCAGTTGCCTTCTTG     | ATTGCCATTGCACAACCTTTTT   |
| <i>Gp91phox</i>               | CCAACCTGGGATAACGAGTTCA   | GAGAGTTTCAGCCAAGGCTTC    |
| <i>Il-1<math>\beta</math></i> | AGTTGACGGACCCAAAAGAT     | GGACAGCCCAGGTCAAAGG      |
| <i>Arginase-1</i>             | GGACCTGGCCTTTGTTGATG     | AGACCGTGGGTTCTTCACAATT   |
| <i>Ym1</i>                    | TCTGGTGAAGGAAATGCGTAAA   | GCAGCCTTGGAAATGTCTTTCTC  |
| <i>Mrc1</i>                   | GTTACCTGGAGTGATGGTTCTC   | AGGACATGCCAGGGTCACCTTT   |
| <i>Igf-1</i>                  | CGCCTCATTATCCCTGCCACCA   | GCCATAGCCTGTGGGCTTGTGAA  |
| <i>Gapdh</i>                  | TGAAGCAGGCATCTGAGGG      | CGAAGGTGGAAGAGTGGGAG     |
| <i>Rpl13a</i>                 | CTGTGAAGGCATCAACATTTCTG  | GACCACCATCCGCTTTTTCTT    |
